# Supplementary material
Source: PubMed Central journal article supplement (PMC130614)
Supplement: pnas_192233099_1.pdf [file pnas_192233099_1.pdf]

**Table 1. Comparison of unitary inhibitory postsynaptic currents (IPSCs) generated at basket cell (BC)–BC and BC–principal neuron (PN) synapses in parvalbumin-EGFP and wild-type (WT) mice**

|                                           | <b>CA1</b>     | <b>CA3</b>     | <b>DG</b>     | <b>DG (WT)</b> |
|-------------------------------------------|----------------|----------------|---------------|----------------|
|                                           | <b>BC–BC</b>   | <b>BC–BC</b>   | <b>BC–BC</b>  | <b>BC–BC</b>   |
| Chemical interactions (IPSCs)             | 8 of 9         | 5 of 6         | 7 of 9        | 8 of 10        |
| Latency IPSC                              | 0.68 ± 0.03 ms | 0.6 ± 0.1 ms   | 0.65 ± 0.1 ms | 0.9 ± 0.1 ms   |
| 20–80% rise time                          | 0.27 ± 0.02 ms | 0.25 ± 0.02 ms | 0.3 ± 0.03 ms | 0.2 ± 0.01 ms  |
| Decay $\tau_w$                            | 1.7 ± 0.1 ms   | 1.2 ± 0.2 ms   | 2.5 ± 0.4 ms  | 2.3 ± 0.3 ms   |
| Peak amplitude                            | 208 ± 54 pA    | 160 ± 46 pA    | 93 ± 22 pA    | 104 ± 28 pA    |
| CV peak amplitude                         | 18 ± 1%        | 16 ± 2%        | 26 ± 4%       | 26 ± 2%        |
| $\tau_1$                                  | 1.2 ± 0.1 ms   | 0.8 ± 0.2 ms   | 1.0 ± 0.2 ms  | 1.4 ± 0.2 ms   |
| $\tau_2$                                  | 8.0 ± 1.2 ms   | 3.8 ± 1.0 ms   | 10.0 ± 2.8 ms | 9.3 ± 1.7 ms   |
| $A_1/(A_1 + A_2)$                         | 0.9 ± 0.03     | 0.84 ± 0.07    | 0.74 ± 0.08   | 0.81 ± 0.06    |
| Percentage of failures                    | 4 ± 3%         | 10 ± 10%       | 5 ± 3%        | 5 ± 4%         |
| PPD at 50 ms                              | 36 ± 2%        | 37 ± 4%        | 24 ± 4%       | 26 ± 4%        |
| Reciprocal chemical coupling              | 1 of 8         | 3 of 5         | 3 of 7        | 4 of 8         |
| Electrical interactions (electrical PSCs) | 2 of 9         | 3 of 6         | 3 of 9        | 6 of 10        |
| Peak amplitude                            | 15 pA          | 89 ± 25 pA     | 31 ± 10 pA    | 84 ± 16 pA     |
|                                           | <b>BC–PN</b>   | <b>BC–PN</b>   | <b>BC–PN</b>  | <b>BC–PN</b>   |
| Chemical interactions (IPSCs)             | 5 of 5         | 3 of 3         | 3 of 3        | 4 of 4         |
| Latency IPSC                              | 0.9 ± 0.1 ms   | 1.1 ± 0.1 ms   | 0.9 ± 0.1 ms  | 0.7 ± 0.1 ms   |
| 20–80% rise time                          | 0.3 ± 0.02 ms  | 0.3 ± 0.02 ms  | 0.2 ± 0.03 ms | 0.2 ± 0.02 ms  |
| Decay $\tau_w$                            | 3.5 ± 0.5 ms   | 3.3 ± 0.1 ms   | 3.4 ± 0.4 ms  | 3.3 ± 0.2 ms   |
| Peak amplitude                            | 387 ± 213 pA   | 214 ± 83.5 pA  | 81.5 ± 11 pA  | 200 ± 50 pA    |
| CV peak amplitude                         | 28 ± 5%        | 32 ± 4%        | 40 ± 4%       | 27 ± 3%        |
| $\tau_1$                                  | 1.2 ± 0.4 ms   | 1.2 ± 0.4 ms   | 1.8 ± 0.7 ms  | 1.3 ± 0.2 ms   |
| $\tau_2$                                  | 7.3 ± 1.9 ms   | 5.9 ± 0.2 ms   | 8.5 ± 3.7 ms  | 5.6 ± 0.4 ms   |
| $A_1/(A_1 + A_2)$                         | 0.6 ± 0.08     | 0.6 ± 0.04     | 0.6 ± 0.2     | 0.5 ± 0.08     |
| Percentage of failures                    | 3 ± 2%         | 0%             | 5.5 ± 4%      | 2.5 ± 2.5%     |
| PPD at 50 ms                              | 33 ± 3%        | 31 ± 1%        | 28 ± 3%       | 39 ± 1%        |

Electrical interactions

0 of 5

0 of 3

0 of 3

0 of 4

---

Values indicate mean  $\pm$  SEM. Numbers given refer to the subset of pairs in which interactions (electrical, chemical, or both) were evident. In total, interactions were observed in approximately  $> 60\%$  of all pairs of EGFP-positive BCs recorded. Values were measured from average IPSCs (failures included). PPD was determined only in a subset of pairs. CV, coefficient of variation = standard deviation/mean. As the properties of unitary IPSCs at BC-BC synapses in the DG of parvalbumin-EGFP mice were indistinguishable from those of WT mice, it was unlikely that synaptic transmission was altered by the expression of EGFP in the transgenic animals.
